1 **Liquid-crystalline lipid phase transitions in lipid droplets selectively remodel the LD**  
2 **proteome**

3  
4 **Authors:** Sean Rogers<sup>1\*</sup>, Long Gui<sup>1\*</sup>, Anastasiia Kovalenko<sup>1\*</sup>, Evan Reetz<sup>1</sup>, Daniela Nicastro<sup>1</sup>,  
5 W. Mike Henne<sup>1,#</sup>

6  
7 **Affiliations:**

8 <sup>1</sup>Department of Cell Biology, UT Southwestern Medical Center, Dallas TX 75390, USA

9 \*these authors contributed equally to this work

10 #correspondence should be sent to: [mike.henne@utsouthwestern.edu](mailto:mike.henne@utsouthwestern.edu)

11

12 **Summary:**

13 Lipid droplets (LDs) are reservoirs for triglycerides (TGs) and sterol-esters (SEs). How lipids are  
14 organized within LDs and influence the LD proteome remains unclear. Using *in situ* cryo-  
15 electron tomography, we show that glucose restriction triggers lipid phase transitions within LDs  
16 generating liquid-crystalline lattices inside them. Mechanistically, this requires TG lipolysis,  
17 which alters LD neutral lipid composition and promotes SE transition to a liquid-crystalline  
18 phase. Fluorescence imaging and proteomics further reveal that LD liquid-crystalline lattices  
19 selectively remodel the LD proteome. Some canonical LD proteins including Erg6 re-localize to  
20 the ER network, whereas others remain on LDs. Model peptide LiveDrop also redistributes from  
21 LDs to the ER, suggesting liquid-crystalline-phases influence ER-LD inter-organelle transport.  
22 Proteomics also indicates glucose restriction elevates peroxisome lipid oxidation, suggesting TG  
23 mobilization provides fatty acids for cellular energetics. This suggests glucose restriction drives  
24 TG mobilization, which alters the phase properties of LD lipids and selectively remodels the LD  
25 proteome.

26

27 **Key words:**

28 triglyceride; sterol-ester; liquid-crystalline layers; phase transition; endoplasmic reticulum; cryo-  
29 electron tomography; cryo-focused ion beam milling

30

31

32

33

## 34 **Introduction**

35 Lipid droplets (LDs) are unique endoplasmic reticulum (ER)-derived organelles  
36 dedicated to the storage of energy-rich neutral lipids. Structurally LDs are composed of a  
37 hydrophobic core of triglycerides (TGs) and sterol-esters (SEs) that is surrounded by a  
38 phospholipid monolayer that either contains or is decorated by specific proteins. Beyond their  
39 roles in energy homeostasis, recent work highlights the roles of LDs in signaling, development,  
40 and metabolism (Welte and Gould, 2017), (Olzmann and Carvalho, 2019), (Walther et al.,  
41 2017). These diverse jobs are largely dictated by the LD proteome, but a pervasive question is  
42 how specific proteins are targeted to the LD surface. Furthermore, whether the LD proteome is  
43 static or dynamic, and how metabolic cues influence LD protein residency is poorly understood.

44 LDs are generated at the ER and often remain connected to the ER bilayer for extended  
45 periods (Jacquier et al., 2011), (Kassan et al., 2013). As such, Type I LD proteins can  
46 translocate between the ER and LD monolayer via lipidic bridges connecting the two organelles  
47 (Wilfling et al., 2013). Elegant *in vitro* studies have suggested that LD localization promotes  
48 energetically favorable conformational changes within some proteins, and the movement of  
49 proteins to LDs from the ER network can even influence their enzymatic activities, or modulate  
50 their degradation (Caillon et al., 2020), (Chorlay and Thiam, 2020), (Leber et al., 1998),  
51 (Schmidt et al., 2013), (Ohsaki et al., 2006). A second mechanism of LD targeting occurs from  
52 the cytoplasm, where soluble proteins insert into the LD monolayer via a hydrophobic region,  
53 amphipathic helix, or lipid moiety. Here hydrophobic protein regions recognize packing defects  
54 between the phospholipid monolayer lipid head groups, enabling their insertion into the neutral  
55 lipid core (Chorlay and Thiam, 2020).

56 Although monolayer phospholipids can regulate LD protein targeting, how *neutral lipids*  
57 influence protein localization is less understood. However, neutral lipids clearly impact the  
58 composition of the LD surface proteome; for example, in yeast, some proteins preferentially  
59 decorate TG-rich LDs (Gao et al., 2017). Molecular studies also indicate that protein insertion  
60 into the LD neutral lipid core enables proteins to fold with lower free energy, and polar residues  
61 within hydrophobic regions can even interact with TG, further anchoring them to the LD (Olarite  
62 et al., 2020). However, how neutral lipid pools ultimately influence the composition and  
63 dynamics of the LD proteome is relatively unexplored, yet central to our understanding of LD  
64 organization and functional diversity.

65 Neutral lipids generally form an amorphous mixture within the hydrophobic LD core. This  
66 organization can change in response to various cellular stimuli. HeLa cells induced into mitotic

67 arrest or starvation exhibit lipid phase transitions within their LDs, generating liquid-crystalline  
68 lattices (LCLs) inside LDs with a striking onion-like appearance by cryo-electron tomography  
69 (cryo-ET) (Mahamid et al., 2019). Yeast biochemical studies also proposed similar segregation  
70 of TGs and SEs into discrete layers within LDs (Czabany et al., 2008). This lipid reorganization  
71 is attributed to the biophysical properties of SEs, which can transition from disordered to  
72 ordered smectic phases under physiological conditions (Kroon, 1981), (Ginsburg et al., 1984),  
73 (Shimobayashi S, 2019), (Czabany et al., 2008). Such phase transitions are also associated  
74 with human pathologies including atherosclerosis, and liquid-crystalline LDs were even  
75 observed in the macrophage of a patient with Tangier disease (Lundberg, 1985), (Katz et al.,  
76 1977). How these phase transitions are triggered, however, and whether they influence  
77 organelle physiology, or are simply a biophysical consequence of the properties of SEs, is  
78 unknown.

79 Here, we utilized budding yeast to dissect the metabolic cues governing lipid phase  
80 transitions within LDs. We used cryo-ET of cryo-focused ion beam (cryo-FIB) milled yeast cells  
81 to study the *in situ* architecture of LDs in their native environment, under ambient or glucose-  
82 starved conditions. We show that in response to acute glucose restriction, yeast initiate TG  
83 lipolysis, which induces the formation of LCLs within LDs. In line with this lipid mobilization,  
84 global proteomics reveals that glucose restriction promotes metabolic remodeling favoring  
85 peroxisome fatty acid oxidation and mitochondrial metabolism. Furthermore, we find LD liquid-  
86 crystalline remodeling selectively changes the LD surface proteome, promoting the  
87 redistribution of some proteins from the LD surface to the ER network while others are retained  
88 on LCL-LDs.

89

90

## 91 **Results:**

### 92 **Acute glucose restriction promotes TG lipolysis-dependent liquid-crystalline phase** 93 **transitions in LDs**

94 Previous studies from our group indicated that budding yeast exposed to acute glucose  
95 restriction (AGR), where yeast are transferred from a glucose-rich (2%) synthetic complete  
96 media to a low-glucose (0.001%) media, exhibit metabolic remodeling that favors the production  
97 of SEs, which are stored in LDs (Rogers et al., 2021). We used cryo-ET to investigate if AGR  
98 also impacts LD morphology. We rapidly froze yeast cells that were either in logarithmic (log-  
99 phase) growth in glucose-rich media, or exposed to 4 hrs of AGR, and used cryo-FIB milling to  
100 generate 100-200-nm-thick lamellae of the vitrified cells. These lamellae were then imaged by

101 cryo-ET to reveal the three-dimensional (3D) structure of native LDs *in situ*. The cryo-FIB milled  
102 lamella exhibited a well-preserved yeast ultrastructure, including the nucleus, vacuole,  
103 mitochondria and LDs (**Figure 1A, SFigure1, SMovie 1**). Typical LDs could be distinguished  
104 from other cellular organelles by their relatively electron-dense, amorphous interior that was  
105 surrounded by a thin phospholipid monolayer (**Figure 1B, SMovie 2**). In contrast to normal LDs  
106 in glucose-fed log-phase cells, ~77% of the LDs observed in 4hrs AGR-treated yeast displayed  
107 reorganization of their interior, including the appearance of distinct concentric rings in the LD  
108 periphery (**Figure 1 C-D, M for quantification, SMovie 3**). These rings appear similar to  
109 lattices previously observed in liquid-crystalline-phase LDs, which exhibited a regular spacing of  
110 ~3.4-3.6nm between their layers, suggesting they were composed of sterol-esters (Mahamid et  
111 al., 2019), (Engelman and Hillman, 1976). Indeed, our line-scan analysis showed a regular  
112 3.4nm spacing between rings (**Figure 1E**), suggesting these LDs exhibited liquid-crystalline  
113 lattices (LCLs). Thus, we refer these “onion-like” LDs as LCL-LDs. Notably, these were never  
114 observed in the log-phase yeast (**Figure 1B, M**).

115 In addition to the peripheral lattices, the amorphous center of LCL-LDs was unusually  
116 sensitive to electron radiation, causing excessive radiolysis and “bubbling” (i.e. the generation of  
117 a gas bubble trapped in the ice that appears white in cryo-EM images) during tilt-series  
118 acquisition (**Figure 1C, white arrow**). This increased radiation sensitivity was only observed in  
119 LCL-LDs, but not in LDs with entirely amorphous lumen (i.e. not observed in the 23% unordered  
120 LDs of AGR-treated yeast, nor in any LDs of log-phase yeast). We generated comparative  
121 ‘bubblegrams’, (i.e. a series of 2D cryo-EM images where the same sample area was exposed  
122 to an increasing amount of electron dose), which revealed that the centers of LCL-LDs exhibited  
123 bubbling following exposure to  $<30 \text{ e}/\text{\AA}^2$ , whereas amorphous LDs from log-phase yeast did not  
124 show any bubbling even at  $400 \text{ e}/\text{\AA}^2$  dosages (**SFigure1 A-J**). Previous studies of electron  
125 radiation-induced bubbling of frozen biomolecules in aqueous solution and cells demonstrated  
126 that similar gas bubbles contained mostly molecular hydrogen gas (Leapman and Sun, 1995)  
127 (Aronova et al., 2011). Although the mechanism of radiation-induced bubbling and increased  
128 radiation-sensitivity within the center of LCL-LDs is not clear, it may be due to the production of  
129 gases derived from a specific combination of lipids or metabolites present within LCL-LDs.

130 To investigate the effects of AGR stress on yeast neutral lipid pools, we monitored TG  
131 and SE levels in log-phase and 4hrs AGR-treated yeast. Indeed, AGR treated yeast contained  
132 significantly less TGs (**Figure 1K**). As expected, AGR yeast also had increased amounts of SEs  
133 (**Figure 1K**), as previously observed (Rogers et al., 2021), indicating the TG:SE ratio within the  
134 LDs was significantly decreased to ~0.5:1.5 compared to a normal ratio of ~1:1 (Leber et al.,



135 1994). We hypothesized that LCL-LD formation was promoted by TG loss from LDs. To test  
136 this, cryo-ET was performed on yeast lacking the major TG lipases (*tg13,4,5Δ*). Indeed, 4hrs  
137 AGR treated *tg13,4,5Δ* yeast did not form any detectable LCL-LDs (**Figure 1G, M**), suggesting  
138 TG lipolysis was required for LCL-LD formation. In support of this, LDs in wildtype (WT) AGR-  
139 treated yeast were significantly smaller in diameter than log-phase LDs, and this reduced size  
140 was suppressed in *tg13,4,5Δ* yeast (**Figure 1N**), suggesting the size reduction was due to lipid  
141 loss via TG lipolysis.

142 To further dissect how TGs influence LCL-LDs, we treated yeast with 0.1% oleic acid  
143 (OA), which promotes TG synthesis. As expected, OA elevated cellular TG levels in yeast when  
144 they were cultured in it during 4hrs AGR treatment (**Figure 1L**), and notably no LCL-LDs were  
145 observed during log-phase nor in this AGR condition (**Figure 1F, H, M**). In line with this,  
146 whereas LD sizes in AGR-treated yeast were significantly smaller than in log-phase cells, their  
147 sizes slightly recovered under the AGR plus OA condition (**Figure 1F, N**). Since we previously  
148 observed that the nucleus-vacuole junction (NVJ) can serve as a site for LD biogenesis during  
149 nutrient stress (Hariri et al., 2018), we also examined whether NVJ loss impacted LCL-LD  
150 formation. Cryo-ET of *nvj1Δ* yeast cells showed the expected loss of tight contacts between the  
151 outer nuclear envelope and the vacuole (**SFigure 1K, L**). However, *nvj1Δ* yeast exhibited ~75%  
152 LCL-LDs under AGR conditions, indicating that the NVJ was not required for LCL-LD formation  
153 (**Figure 1I, J, M**).

154 Since SEs can form liquid-crystalline lattices, we tested whether SEs were required for  
155 LCL-LD formation. We monitored LDs in *are1are2Δ* yeast that cannot synthesize SEs.  
156 Surprisingly, in 15 different cryo-FIB lamella of *are1are2Δ* yeast cells no LDs could be observed  
157 (**SFigure 1M**). However, fluorescence staining with monodansylpentane (MDH) LD stain  
158 confirmed the presence of LDs in *are1are2Δ* yeast during AGR stress, but they were small and  
159 sparse in many yeast compared to any of the other examined strains (**SFigure 1N**). The  
160 reduction in LD size and abundance may account for the inability to observe LDs in the cryo-  
161 tomograms of the 100-200nm thick lamellae.

162 Collectively, these data suggest that TG abundance is a key modulator of the SE phase  
163 transitions within the LD, and indicate Tgl-dependent TG lipolysis during AGR promotes LCL-LD  
164 formation by depleting the TG pool that maintains SE in its disordered phase.

165

166 **LCL-LD formation selectively remodels the LD proteome**

167 While studies indicate that LD proteins may interact with TGs contained within the LD  
168 interior (Olarite et al., 2020), (Santinho et al., 2021), it is unknown whether smectic lipid phase  
169 transitions influence LD protein targeting. Therefore, we imaged the canonical LD protein Erg6  
170 tagged with mNeonGreen (Erg6-mNg) over time in AGR conditions. As expected, Erg6-mNg  
171 initially colocalized with LD stain at the start of AGR (t=0). However, the Erg6 labeling pattern  
172 changed after ~1hr AGR, and primarily decorated the cortical ER and nuclear envelope (**Figure**  
173 **2A**). Erg6-mNg remained at the ER network throughout 2, 4, and 24 hrs AGR, and notably the  
174 LD stain gradually dimmed over these time-points, consistent with the loss of LD volume via  
175 lipolysis. Remarkably, the addition of 0.1% OA, or genetic ablation of TG lipases both rescued  
176 Erg6-mNg LD targeting at 4hrs AGR (**Figure 2B, SFigure 2A**). Since our cryo-ET results  
177 showed lack of LCL-LD formation in these conditions, it suggested that Erg6-mNg de-  
178 localization from LDs tightly correlates with LCL-LD formation.

179 To more directly test whether the biophysical properties of LD lipids influenced Erg6-  
180 mNg localization, rather than other metabolic changes attributed to AGR stress, we briefly  
181 heated Erg6-mNg expressing yeast after 4hrs AGR to 40°C, which is above the predicted phase  
182 transition temperature for smectic-phase SEs. Indeed, Erg6-mNg significantly, although not  
183 fully, re-localized from the ER network to LDs after only 15 minutes at 40°C (**Figure 2B**). To  
184 quantify the extent of Erg6-mNg LD localization, we calculated its relative Manders M1  
185 coefficient, which measures total Erg6-mNg signal that overlaps with LD marker MDH. 4hrs  
186 AGR stress was accompanied by an ~75% decrease in Erg6-mNg positive LDs (**Figure 2C**). In  
187 agreement with imaging, addition of 0.1% OA returned the M1 coefficient to WT values. Brief  
188 heating also significantly, though not fully, increased the M1 coefficient.

189 Next, we investigated whether AGR caused a general de-localization of other canonical  
190 LD proteins from LDs. However, Pln1-mNg, a perilipin-like protein also known as Pet10 (Gao et  
191 al., 2017), maintained stable LD association following 4hrs AGR, suggesting the de-localization  
192 of LD proteins during LCL-LD formation may be selective (**Figure 2D, E**). Recently, perilipin  
193 homo-oligomerization was proposed to contribute to the stable association of perilipins on LDs  
194 (Giménez-Andrés et al., 2021). To test whether oligomerization could enhance LD protein  
195 targeting during AGR, we artificially oligomerized Erg6 by tagging it with tetrameric DsRed2.  
196 Indeed, unlike monomeric Erg6-mNg, Erg6-DsRed2 maintained LD targeting during 4hrs AGR  
197 (**SFigure 2B**). Collectively, this suggests that: 1) LD protein de-localization during AGR-  
198 associated LCL-LD formation may be selective for certain proteins, and 2) oligomerization may  
199 enhance protein retention on these LDs.

200

## 201 **Imaging known LD proteins reveals their selective retargeting to the ER during AGR**

202         Given the different targeting patterns of Erg6 and Pln1 in AGR, we next examined the  
203 location of other annotated LD proteins by tagging them with mNeonGreen (mNg) and  
204 examining them in log-phase and 4hrs AGR-treated yeast. As expected, four known LD proteins  
205 Rer2-mNg, Hfd1-mNg, Yeh1-mNg (an LD-localized SE lipase), mNg-Say1 (which is annotated  
206 to target both LDs and the ER network), primarily decorated LDs in log-phase yeast. However,  
207 after 4hrs AGR all four proteins displayed ER and nuclear envelope localization, and displayed  
208 significantly reduced M1 coefficients, like Erg6 (**Figure 3A, B**). Similarly, Ayr1-mNg (a  
209 bifunctional lipase), as well as Anr2-mNg (a LD protein of unknown function predicted to be  
210 palmitoylated) also localized to LDs in log-phase yeast, but displayed primarily ER network  
211 targeting after 4hrs AGR (**SFigure 3A**). Collectively, this suggests that similar to Erg6, many  
212 canonical LD proteins exhibit more ER localization following AGR exposure, and indicates that  
213 LCL-LD formation may alter the protein composition of the LD surface.

214         Protein movement between the LD and ER compartments has previously been  
215 described for Type I LD proteins, which move between the ER and LDs via lipidic bridges  
216 connecting them (Wang et al., 2016). Although we observed several proteins that localized  
217 more prominently to the ER versus LDs during AGR, whether any of these represented  
218 canonical Type I LD proteins was not clear. Therefore, to interrogate whether Type I LD proteins  
219 could be re-targeted or retained at the ER during LCL-LD formation, we monitored GFP-tagged  
220 LiveDrop (Wang et al., 2016), a minimal model polypeptide for Type I LD proteins, in log-phase  
221 and 4hrs AGR-treated yeast. As expected, GFP-LiveDrop localized predominantly to LDs in log-  
222 phase yeast, but a dim ER network signal was also detected, consistent with its dual organelle  
223 targeting (**Figure 3C**). In contrast, following 4hrs AGR GFP-LiveDrop was more prominently at  
224 the ER network, and its M1 coefficient was significantly decreased (**Figure 3C, D**). This  
225 suggests that AGR and the associated LCL-LD formation promotes Type I LD protein re-  
226 distribution to, or retention at, the ER network versus LDs.

227         Since TG lipases were required for LCL-LD formation in AGR (**Figure 1G, M**), we next  
228 monitored the sub-cellular localization of all Tgl lipases by fluorescence microscopy. As  
229 expected, the major TG lipase Tgl3-mNg, as well as Tgl4-mNg (TG lipase) and Tgl1-mNg (SE  
230 lipase) all decorated LDs in log-phase yeast (**Figure 3E, F**). Remarkably, all three proteins  
231 retained LD localization following 4hrs AGR, likewise displaying unaltered M1 coefficients  
232 (**Figure 3E, F**). Tgl5-mNg (TG lipase) also displayed LD targeting in both log-phase and 4hrs  
233 AGR yeast (**SFigure 3B**). This suggests that in contrast to several other LD proteins, Tgl lipases

234 maintain LD association during AGR, where they locally deplete the LD TG pool, promoting lipid  
235 phase transitions within the LD.

236

### 237 **Comparative proteomics reveals changes to the LD proteome in AGR stress**

238 Since fluorescence imaging revealed that several LD proteins change sub-cellular  
239 distribution in AGR conditions, we next aimed to comprehensively map how AGR stress alters  
240 the LD proteome. We performed LC-MS/MS proteomics on LDs that were isolated from log-  
241 phase and 4hrs AGR-treated yeast using density gradient centrifugation (**Figure 4A**). To  
242 evaluate the quality of our LD isolation protocol, we performed Western blotting of whole-cell  
243 lysates and the subsequent LD isolation fractions. We found a clear de-enrichment of  
244 mitochondrial protein Por1 and the abundant plasma membrane protein Pma1 in the LD  
245 fractions, suggesting the LD fractions were relatively pure (**Figure 4B**).

246 Given that AGR stress likely changes the global abundance of some proteins, we also  
247 conducted LC-MS/MS proteomics on the non-LD infranatant fractions generated during LD  
248 isolation, as well as whole-cell lysates of yeast in log-phase or 4hrs AGR treatment. We  
249 combined these datasets with our isolated LD proteomics to obtain a more robust dataset of  
250 high-confidence LD proteins in these conditions. This approach generated an adjusted LD  
251 enrichment score, defined as the “LD confidence score”. The approach is based on previous  
252 work from (Bersuker et al., 2018), and accounts for the spectral abundance of each protein in  
253 the LD fraction, while subtracting out the corresponding abundance from the non-LD infranatant  
254 fraction. Plotting this LD confidence score (x-axis) as a function of protein whole-cell  
255 abundances (y-axis) thus identified candidate proteins that enriched or de-enriched in AGR-  
256 associated LD fractions (**Figure 4C**). For example, proteins that increased in relative abundance  
257 in LD fractions during AGR are represented on the right side of the x-axis, whereas those that  
258 decreased are on the left side. It should be noted that many proteins did not change greatly in  
259 overall whole-cell abundance, and are thus are positioned along 0 on the y-axis. As expected,  
260 many proteins not normally associated with LDs change little on the x-axis, but may change  
261 substantially in whole-cell abundance during AGR, and are thus positioned vertically along the  
262 y-axis.

263 As expected, this approach revealed that Erg6 was among the most de-enriched  
264 proteins in LD fractions at 4hrs AGR (**Figure 4C, left side of plot**), whereas Pln1 was one of  
265 the most enriched (**Figure 4C, right side of plot**). Notably the LC-MS/MS detected nearly all  
266 annotated LD proteins (Currie et al., 2014), although some of these displayed changes in  
267 abundance that appeared different from the localization patterns we observed by fluorescence

268 microscopy (**SFigure 4A**). The reason for these distinctions likely reflects the differences  
269 between imaging and biochemical methodologies, as well as some (expected) contamination of  
270 the LD fractions with co-purifying ER membranes during the LD isolation.

271 Using this approach, our proteomics also revealed a subset of proteins that are not  
272 annotated to localize to LDs, but were nonetheless detected in high abundance in the isolated  
273 LD fractions during AGR stress. This included Iml2 (**Figure 4C, right side of plot**), which is a  
274 sterol-associated protein required for the clearance of protein inclusions, and was previously  
275 observed associated with LDs bound to inclusion bodies (Moldavski et al., 2015). To investigate  
276 this, we imaged mNg-tagged Iml2, revealing that Iml2-mNg was throughout the cytoplasm in  
277 log-phase yeast, whereas it subtly decorated the nuclear envelope and cortical ER at 4hrs AGR  
278 (**SFigure 4B**). Even though we did not visibly detect Iml2-mNg on LDs, this may be because  
279 LDs need to be associated with protein inclusions for Iml2 to visibly enrich on them by  
280 fluorescence microscopy (Moldavski et al., 2015).

281 Our proteomics also indicated that two proteins containing Bin/Amphiphysin/Rvs (BAR)  
282 domains involved in Golgi/endosomal membrane trafficking, Snx4 and Gvp36, were enriched on  
283 LDs following 4hrs AGR (**Figure 4C**). BAR domains are membrane binding modules, and many  
284 BAR proteins contain amphipathic helices or other membrane inserting modules that could, in  
285 principle, insert into LDs. Furthermore, BAR protein GRAF1a was previously observed on LDs  
286 in human cells (Lucken-Ardjomande Häsler et al., 2014). Indeed, while Snx4-mNg formed  
287 cytoplasmic foci not colocalized with LDs in log-phase growth, Snx4-mNg foci did appear co-  
288 localized with a subset of LDs following 4hrs AGR (**Figure 4D**). In contrast, Gvp36-mNg  
289 distributed mostly throughout the cytoplasm in both log-phase and 4hrs AGR stress, and was  
290 not detectably enriched on LDs by fluorescence microscopy (**SFigure 4B**). Collectively, this  
291 indicates that AGR stress, which results in SE phase transition and LCL-LD formation, also  
292 selectively remodels the LD proteome. The uncoating of canonical proteins from LDs may lead  
293 to enhanced LD association of non-canonical factors or membrane trafficking proteins with the  
294 phospholipid surface of LDs.

295

## 296 **Global proteomics indicates AGR promotes fatty acid oxidation during metabolic** 297 **remodeling**

298 Energy depletion drives metabolic remodeling in yeast, favoring the reorganization of  
299 organelles and the utilization of alternative carbon sources when glucose is restricted (Marini et  
300 al., 2020) (Eisenberg and Büttner, 2014). Since we conducted whole-cell LC-MS/MS proteomics  
301 of log-phase and 4hrs AGR yeast, we next examined these datasets to determine whether

302 changes in whole-cell protein abundances revealed patterns of metabolic remodeling that  
303 involved LDs and their lipids. Indeed, we found that 4hrs AGR stress induced changes in the  
304 abundances of many proteins involved in fatty acid metabolism. In particular, peroxisome  
305 enzymes involved in fatty acid oxidation (FAO), including Pot1, Fox2, and Cta1 were among the  
306 most increased in abundance during AGR compared to log-phase growth (**Figure 4E, right**  
307 **side of plot**). Also elevated were the peroxisome-associated fatty acyl-CoA ligase Faa2, the  
308 acetyl-CoA transporter Crc1 (which transports acetyl-CoA derived from peroxisome FAO to  
309 mitochondria), as well as Yat1, a carnitine acetyl-transferase that works with Crc1 to promote  
310 acetyl-CoA utilization within mitochondria. Enzymes related to the tricarboxylic acid cycle  
311 including Icl1 and Idp2, the malate synthase Mls1, and acetyl-CoA synthase Acs1 were also  
312 among the most elevated proteins in AGR-treated yeast (**Figure 4E**). In contrast, amino acid  
313 transporters like Mup1 and Lyp1 were significantly decreased in abundance (**Figure 4E, left**  
314 **side of plot**), consistent with their turnover during glucose starvation that promotes adaptive  
315 metabolic remodeling (Lang et al., 2014), (Wood et al., 2020).

316 Collectively, this indicates that glucose restriction promotes the mobilization of TGs from  
317 LDs that may provide fatty acids as fuel for cellular energetics in peroxisomes and mitochondria.  
318 Indeed, acetyl-CoA generated by peroxisome FAO can be delivered to mitochondria to fuel its  
319 energetics in the absence of glucose, suggesting inter-organelle remodeling during glucose  
320 restriction that enables LD-derived lipids to ultimately fuel alternative carbon metabolism. An  
321 additional consequence of this Tgl-dependent TG mobilization is a shift in the neutral lipid ratios  
322 in LDs, ultimately giving rise to SE transition into a liquid-crystalline phase within the LDs.

323

## 324 **Discussion**

325 Emerging evidence suggests the phase transition properties of cellular biomolecules,  
326 such as proteins in membraneless organelles, directly influence cell physiology and  
327 organization. Like proteins, lipids also undergo phase transitions, and can form liquid-crystalline  
328 lattices that are observed in human diseases like atherosclerosis, or in organelles like LDs.  
329 However, the metabolic cues that drive these phenomena, and their impact on organelle  
330 physiology, are unclear. Here we show that in yeast, AGR stress promotes the formation of  
331 liquid-crystalline lipid phase transitions within LDs. These transitions require TG lipolysis,  
332 suggesting the loss of TG within the hydrophobic core of LDs promotes the transition of SEs  
333 from an amorphous to a smectic liquid-crystalline phase. In agreement with this, we find AGR  
334 drives metabolic remodelling that elevates peroxisome-mediated lipid oxidation. Furthermore,  
335 we provide evidence that LCL-LD phase transitions alter the LD proteome (**Figure 4F**).



336           How proteins are targeted to LDs is still poorly understood, and involves trafficking from  
337 the ER network or cytoplasm to the LD surface. In this study, we revealed that the LD proteome  
338 dramatically differs between AGR-treatment and log-phase growth. Erg6, a canonical LD  
339 protein, relocates to or is retained at the ER network, suggesting it moves from LDs to the ER  
340 via a lipidic bridge. This LD delocalization appears suppressed or quickly reversed when yeast  
341 cells are briefly heated to 40°C, (i.e. above the predicted melting temperature of smectic-phase  
342 SEs), suggesting direct movement of the proteins between LD and ER via ER-LD connections.  
343 In line with this, GFP-LiveDrop, which under log-phase conditions targets primarily to LDs,  
344 appears predominantly ER localized during AGR. Collectively, this suggests that Type I LD  
345 proteins favor ER localization versus the surface of LCL-LDs. This also indicates that many  
346 yeast LDs maintain connections to the ER network and thus exhibit the lipidic bridges necessary  
347 for this inter-organelle trafficking, consistent with earlier work (Jacquier et al., 2011). The  
348 redistribution of LD proteins to the ER may be due to changes in LD monolayer fluidity after  
349 LCL-LD formation, which could alter the energetic favorability of proteins to remain on the LD  
350 surface. We also cannot rule out that the lipid composition of the ER network changes during  
351 AGR to a state that favors protein targeting or retention. We also find that artificially  
352 multimerizing Erg6 with a DsRed2 tag promotes its LD retention at AGR, implying protein  
353 oligomerization enhances LD retention, as has previously been observed for perilipins  
354 (Giménez-Andrés et al., 2021).

355           Whereas Erg6 delocalized from LDs during AGR, TG lipases Tgl3,4,5 remained LD  
356 bound. Although the LD anchoring mechanisms for Tgl lipases are not fully understood, this  
357 implies that LDs continue to mobilize TG during AGR, gradually altering the TG:SE neutral lipid  
358 ratio in a manner that supports SE phase transition. Indeed, AGR-treated yeast contain less  
359 TGs, consistent with lipolysis that provides fatty acids to fuel metabolic energetics. Fatty acids  
360 derived from these TGs are likely substrates for peroxisome FAO, of which several key  
361 enzymes are elevated during AGR stress. The acetyl-CoA produced from FAO could also fuel  
362 mitochondrial energetic pathways, several proteins of which are elevated by proteomics. LCL-  
363 LDs also exhibited de-targeting of enzymes like Hfd1, Rer2, and Say1. It is possible these  
364 enzymes' re-distributions influences their activities, and therefore promote metabolic  
365 remodeling. Indeed, several Erg pathway enzymes also appeared de-enriched from LDs during  
366 AGR by proteomics, and Erg1 is more active at the ER than on LDs (Leber et al., 1998).

367           Our proteomic and imaging analysis also revealed that LDs may become decorated with  
368 non-LD proteins during AGR stress. This included the BAR domain protein Snx4, which co-  
369 localized with some LDs only during AGR stress. As BAR proteins contain membrane



370 binding/inserting modules, it is possible that Snx4 associates with LDs during AGR by inserting  
371 into its monolayer surface. Since the LD surface is normally densely coated with proteins, it is  
372 also possible Snx4 and other proteins may associate with the LD surface as it is uncoated of  
373 canonical LD proteins during AGR stress. Proteomics also detected Iml2 on LDs during AGR.  
374 Previous work proposed that Iml2 associated with LDs, and promoted the delivery of sterols to  
375 protein inclusions during their clearance in an unknown mechanism involving LDs (Moldavski et  
376 al., 2015). Although unclear, it is possible Iml2 may influence sterol metabolism on LCL-LDs.

377 This study is a significant step toward enhancing understanding how lipid phase  
378 transitions influence LD and organelle protein composition and ultimately function. Future  
379 studies will interrogate whether such changes in the LD proteome reflect metabolic remodeling  
380 that ultimately enable yeast to adapt to glucose shortage.

381

## 382 **Materials and Methods**

383 Please see STAR Methods for a full description of the Methodology.

384

## 385 **Acknowledgement**

386 We thank Jonathan Friedman, and members of the Henne and Nicastro labs for helpful insights  
387 during this study. We thank Daniel Stoddard for management of the UTSW electron microscope  
388 facilities and training, and Gang Fu for some data acquisition. The UT Southwestern Cryo-  
389 Electron Microscopy Facility is supported in part by the CPRIT Core Facility Support Award  
390 RP170644. We would also like to thank the UTSW proteomics and live cell imaging facilities for  
391 their assistance with data collection and analysis. Finally, we would like to thank Dr. Joel  
392 Goodman for the Pln1 antibody. W.M.H. is supported by funds from the Welch Foundation (I-  
393 1873), the NIH NIGMS (GM119768), NIDDK (DK126887), Ara Parseghian Medical Research  
394 Fund, and the UT Southwestern Endowed Scholars Program. S.R. is supported in part by a NIH  
395 T32 training grant (5T32GM008297). L.G., E.R., and D.N. are supported by the Cancer  
396 Prevention and Research Institute of Texas grant RR140082 to D.N. This research was  
397 supported in part by the computational resources provided by the BioHPC supercomputing  
398 facility located in the Lyda Hill Department of Bioinformatics, UT Southwestern Medical Center.

399

## 400 **Figure Legends**

401 **Figure 1: Visualization of the liquid-crystalline layers in lipid droplets (LCL-LD) promoted**  
402 **by TG lipolysis using *in situ* cryo-ET. A)** Representative tomographic slice from a cryo-FIB-  
403 milled and cryo-ET reconstructed wildtype (WT) yeast cell grown for 4hrs under acute glucose

404 restriction (AGR). Note the “bubbled” (lighter) centers of the LDs (L). V, vacuole. N, nucleus. A  
405 different tomographic slice of the boxed LD is also shown in (C). **B-J)** Representative  
406 tomographic slices of LDs in yeast from glucose-fed WT in log phase (B), WT after 4hrs AGR  
407 (C, boxed area magnified in D, E shows line-scan plot of area between yellow arrowheads), WT  
408 after 4hrs AGR + 0.1% oleate (OA) (F), *tg13,4,5Δ* yeast after 4hrs AGR (G), WT cultured with  
409 2% glucose and 0.1% OA (H), *nvj1Δ* after 4hrs AGR (I, and boxed area magnified in J). Liquid-  
410 crystalline layers (LCL) were only observed in LDs from WT and *nvj1Δ* yeasts in AGR (C, D, I,  
411 J). White arrows highlight the ‘bubbles’ due to electron radiation in centers of LCL-LDs. K)  
412 Quantification of relative whole-cell TGs and SEs in log and 4hrs AGR conditions. L) Relative  
413 TGs in log and 4hrs AGR conditions. M, N) % abundance of LCL-LDs (M) and diameters of LDs  
414 (N) under various conditions measured in cryo-tomograms. Note that the observed diameter  
415 depends on the plane at which the LDs were sectioned; therefore, for size measurements, only  
416 LDs with clearly visible monolayer (indicating a slice through the LD center) were included.  
417 Scale bars: 200nm (A). 50nm (B-C, F-I). 20nm (D, J).

418  
419 **Figure 2: Erg6 LD de-localization correlates with LCL-LD formation.** A) Yeast expressing  
420 Erg6-mNeonGreen (mNg) and stained for LDs (monodansylpentane, MDH) at time-points when  
421 yeasts were transferred from log-phase (2% glucose) to acute glucose restriction (AGR). Red  
422 arrows indicate protein targeting. B) Yeast with Erg6-mNg and LD/MDH stain in log-phase (2%  
423 glucose), AGR, and AGR+0.1% oleate (OA), and AGR+15min 40°C. C) Manders M1 coefficient  
424 of Erg6-mNg colocalization with LD stain MDH in various conditions. D) Pln1/Pet10-mNg in log  
425 and 4hrs AGR. E) M1 coefficient of Pln1-mNG with LD targeting. Statistics are one-way  
426 ANOVA. Scale bars 5μm.

427  
428 **Figure 3: Fluorescence imaging reveals selective remodeling of LD proteome during**  
429 **AGR.** A) Yeast with mNeongreen (mNg)-tagged LD proteins with MDH LD stain in log and 4hrs  
430 AGR. B) M1 coefficient of proteins in A. C) Yeast with GFP-LiveDrop and MDH LD stain in log  
431 and 4hrs AGR yeast. D) M1 coefficient of proteins in C. E) Yeast with mNg-tagged Tgl1,3,4 and  
432 stained with MDH LD marker in log-phase or 4hrs AGR. F) M1 coefficient of proteins in E. Scale  
433 bars 5μm.

434  
435 **Figure 4: Comparative proteomics indicates non-canonical protein association with LDs,**  
436 **and metabolic remodeling during AGR.** A) Schematic of LD isolation protocol. B) Western  
437 blot of whole cell lysate (WCL), and fractions of LD isolation protocol as in A. Pma1: plasma

438 membrane marker, Por1: mitochondria marker. Pln1: LD marker. Tubulin: cytoplasmic marker  
439 **C)** Plot of protein abundances in whole-cell proteomics (y-axis) versus their change in LD  
440 confidence score (see methods for description of this value) Data are average of 4 independent  
441 expts. **D)** Micrographs of Snx4-mNg and LD/MDH stain in log and 4hrs AGR yeast with M1  
442 coefficient of LD colocalization. **E)** Volcano plot showing  $\log_{10}$  p-value and  $\log_2$  abundance  
443 changes in whole-cell abundance of proteins in 4hrs AGR treatment versus 2% glucose log-  
444 phase growth. Proteins on right are increased in whole-cell abundance with 4hrs AGR, those of  
445 left decreased in abundance. Data are average of 4 independent expts. **F)** Model depicting TG  
446 lipolysis driven LCL-LD formation, and resulting changes in LD translocation to ER network  
447 targeting. Scale bars 5 $\mu$ m.

448

#### 449 **Supplemental Figure Legends:**

#### 450 **Supplemental Figure 1: LD lipid phase transitions characterized by cryo-FIB and cryo-ET.**

451 **A-J)** Electron dose series (“bubblegrams”) for LDs from cryo-FIB milled WT yeast in log phase  
452 (**A-E**) or after AGR (**F-J**); series of 2D cryo-EM images were recorded of the same LDs exposed  
453 to increasing electron dose (1 - 400 e-/Å<sup>2</sup>). Note that liquid-crystalline layers (LCLs) (see box in  
454 **G** magnified in **J**) and excessive bubbling in LD centers (starting at an electron dose <30 e-/Å<sup>2</sup>)  
455 occurred only under AGR. Even at 400 e-/Å<sup>2</sup> electron dose, minimal bubbling (white arrowheads  
456 in **E**).was observed in log WT. **K-M)** Representative tomographic slices from cryo-FIB-milled  
457 and cryo-ET reconstructed WT in log phase (**K**), *nvj1Δ* yeasts after 4hrs AGR (**L**), and  
458 *are1are2Δ* yeast after 4hrs AGR (**M**). The nucleus-vacuole junction (black arrowheads in **K** and  
459 **M**) was observed in WT and *are1are2Δ* yeasts, but absent in *nvj1Δ* yeast (white arrowhead in  
460 **L**). No LDs were found in *are1are2Δ* yeast. V, vacuole. N, nucleus. L, lipid droplet, M,  
461 mitochondrion. **N)** Yeast stained with LD marker MDH in log and 4hrs AGR. Scale bars: 50nm  
462 (A-I), 200nm (K-M), 25nm (J).

463

464 **Supplemental Figure 2: Erg6 LD targeting is influenced by AGR-associated LCL-LD**  
465 **formation. A)** WT or *tgl3,4,5Δ* Erg6-GFP yeast in log or AGR conditions. **B)** Erg6-DsRed2  
466 localized to LDs in log and 4hrs AGR. Scale bars 5 $\mu$ m.

467

468 **Supplemental Figure 3: Selective delocalization of LD proteins during AGR stress. A)**  
469 Yeast expressing mNg-tagged Ayr1 and Anr2 and stained with LD marker MDH in log-phase or  
470 4hrs AGR conditions. **B)** Yeast expressing Tgl5-mNg with MDH LD stain. Scale bars 5 $\mu$ m.

471

472 **Supplemental Figure 4: Additional LD proteins examined in log-phase and AGR**  
473 **conditions. A)** Heat map depicting relative % changes in annotated LD proteins from log to  
474 4hrs AGR conditions. Average of 4 independent log-phase and 4hrs AGR experiments. **B)**  
475 Yeast with mNg-tagged Iml2 or Gvp36 and stained with MDH in log-phase and 4hrs AGR  
476 conditions. Scale bars 5 $\mu$ m.

477

478 **Supplemental Movie 1:** Tomographic reconstruction of a cryo-FIB-milled WT yeast cell after  
479 4hrs acute glucose restriction. Compare with Figure 1A. Scale bar: 200nm.

480

481 **Supplemental Movie 2:** Tomographic reconstruction of a LD from a cryo-FIB-milled WT yeast  
482 cell in log phase (grown with 2% glucose). Compare with Figure 1B. Scale bar: 50nm.

483

484 **Supplemental Movie 3:** Tomographic reconstruction of a LD from a cryo-FIB-milled WT yeast  
485 cell after 4hrs AGR. Compare with Figure 1C. Scale bar: 50nm.

486

#### 487 **References**

488 Aronova, M.A., Sousa, A.A., and Leapman, R.D. (2011). EELS characterization of radiolytic  
489 products in frozen samples. *Micron (Oxford, England : 1993)* *42*, 252-256.

490 Bersuker, K., Peterson, C.W.H., To, M., Sahl, S.J., Savikhin, V., Grossman, E.A., Nomura, D.K.,  
491 and Olzmann, J.A. (2018). A Proximity Labeling Strategy Provides Insights into the Composition  
492 and Dynamics of Lipid Droplet Proteomes. *Developmental cell* *44*, 97-112 e117.

493 Caillon, L., Nieto, V., Gehan, P., Omrane, M., Rodriguez, N., Monticelli, L., and Thiam, A.R.  
494 (2020). Triacylglycerols sequester monotopic membrane proteins to lipid droplets. *Nature*  
495 *communications* *11*, 3944.

496 Chorlay, A., and Thiam, A.R. (2020). Neutral lipids regulate amphipathic helix affinity for model  
497 lipid droplets. *The Journal of cell biology* *219*.

498 Currie, E., Guo, X., Christiano, R., Chitraju, C., Kory, N., Harrison, K., Haas, J., Walther, T.C.,  
499 and Farese, R.V. (2014). High confidence proteomic analysis of yeast LDs identifies additional  
500 droplet proteins and reveals connections to dolichol synthesis and sterol acetylation[S]. *Journal*  
501 *of lipid research* *55*, 1465-1477.

- 502 Czabany, T., Wagner, A., Zweytick, D., Lohner, K., Leitner, E., Ingolic, E., and Daum, G. (2008).  
503 Structural and biochemical properties of lipid particles from the yeast *Saccharomyces*  
504 *cerevisiae*. *The Journal of biological chemistry* 283, 17065-17074.
- 505 Eisenberg, T., and Büttner, S. (2014). Lipids and cell death in yeast. *FEMS Yeast Res* 14, 179-  
506 197.
- 507 Engelman, D.M., and Hillman, G.M. (1976). Molecular organization of the cholesteryl ester  
508 droplets in the fatty streaks of human aorta. *The Journal of clinical investigation* 58, 997-1007.
- 509 Gao, Q., Binns, D.D., Kinch, L.N., Grishin, N.V., Ortiz, N., Chen, X., and Goodman, J.M. (2017).  
510 Pet10p is a yeast perilipin that stabilizes lipid droplets and promotes their assembly. *Journal of*  
511 *Cell Biology* 216, 3199-3217.
- 512 Giménez-Andrés, M., Emeršič, T., Antoine-Bally, S., D'Ambrosio, J.M., Antonny, B., Derganc, J.,  
513 and Čopič, A. (2021). Exceptional stability of a perilipin on lipid droplets depends on its polar  
514 residues, suggesting multimeric assembly. *eLife* 10, e61401.
- 515 Ginsburg, G.S., Walsh, M.T., Small, D.M., and Atkinson, D. (1984). Reassembled plasma low  
516 density lipoproteins. Phospholipid-cholesterol ester-apoprotein B complexes. *The Journal of*  
517 *biological chemistry* 259, 6667-6673.
- 518 Hariri, H., Rogers, S., Ugrankar, R., Liu, Y.L., Feathers, J.R., and Henne, W.M. (2018). Lipid  
519 droplet biogenesis is spatially coordinated at ER-vacuole contacts under nutritional stress.  
520 *EMBO reports* 19, 57-72.
- 521 Jacquier, N., Choudhary, V., Mari, M., Toulmay, A., Reggiori, F., and Schneiter, R. (2011). Lipid  
522 droplets are functionally connected to the endoplasmic reticulum in *Saccharomyces cerevisiae*.  
523 *Journal of cell science* 124, 2424-2437.
- 524 Kassan, A., Herms, A., Fernandez-Vidal, A., Bosch, M., Schieber, N.L., Reddy, B.J., Fajardo,  
525 A., Gelabert-Baldrich, M., Tebar, F., Enrich, C., *et al.* (2013). Acyl-CoA synthetase 3 promotes  
526 lipid droplet biogenesis in ER microdomains. *The Journal of cell biology* 203, 985-1001.
- 527 Katz, S.S., Small, D.M., Brook, J.G., and Lees, R.S. (1977). The storage lipids in Tangier  
528 disease. A physical chemical study. *The Journal of clinical investigation* 59, 1045-1054.

- 529 Kroon, P.A. (1981). The order-disorder transition of the core cholesteryl esters of human plasma  
530 low density lipoprotein. A proton nuclear magnetic resonance study. *The Journal of biological*  
531 *chemistry* 256, 5332-5339.
- 532 Lang, M.J., Martinez-Marquez, J.Y., Prosser, D.C., Ganser, L.R., Buelto, D., Wendland, B., and  
533 Duncan, M.C. (2014). Glucose starvation inhibits autophagy via vacuolar hydrolysis and induces  
534 plasma membrane internalization by down-regulating recycling. *The Journal of biological*  
535 *chemistry* 289, 16736-16747.
- 536 Leapman, R.D., and Sun, S. (1995). Cryo-electron energy loss spectroscopy: observations on  
537 vitrified hydrated specimens and radiation damage. *Ultramicroscopy* 59, 71-79.
- 538 Leber, R., Landl, K., Zinser, E., Ahorn, H., Spök, A., Kohlwein, S.D., Turnowsky, F., and Daum,  
539 G. (1998). Dual localization of squalene epoxidase, Erg1p, in yeast reflects a relationship  
540 between the endoplasmic reticulum and lipid particles. *Molecular biology of the cell* 9, 375-386.
- 541 Leber, R., Zinser, E., Zellnig, G., Paltauf, F., and Daum, G. (1994). Characterization of lipid  
542 particles of the yeast, *Saccharomyces cerevisiae*. *Yeast (Chichester, England)* 10, 1421-1428.
- 543 Lucken-Ardjomande Häslér, S., Vallis, Y., Jolin, H.E., McKenzie, A.N., and McMahon, H.T.  
544 (2014). GRAF1a is a brain-specific protein that promotes lipid droplet clustering and growth, and  
545 is enriched at lipid droplet junctions. *Journal of cell science* 127, 4602-4619.
- 546 Lundberg, B. (1985). Chemical composition and physical state of lipid deposits in  
547 atherosclerosis. *Atherosclerosis* 56, 93-110.
- 548 Mahamid, J., Tegunov, D., Maiser, A., Arnold, J., Leonhardt, H., Plitzko, J.M., and Baumeister,  
549 W. (2019). Liquid-crystalline phase transitions in lipid droplets are related to cellular states and  
550 specific organelle association. *Proceedings of the National Academy of Sciences* 116, 16866-  
551 16871.
- 552 Marini, G., Nüske, E., Leng, W., Alberti, S., and Pigino, G. (2020). Reorganization of budding  
553 yeast cytoplasm upon energy depletion. *Molecular biology of the cell* 31, 1232-1245.
- 554 Moldavski, O., Amen, T., Levin-Zaidman, S., Eisenstein, M., Rogachev, I., Brandis, A.,  
555 Kaganovich, D., and Schuldiner, M. (2015). Lipid Droplets Are Essential for Efficient Clearance  
556 of Cytosolic Inclusion Bodies. *Developmental cell* 33, 603-610.

- 557 Ohsaki, Y., Cheng, J., Fujita, A., Tokumoto, T., and Fujimoto, T. (2006). Cytoplasmic lipid  
558 droplets are sites of convergence of proteasomal and autophagic degradation of apolipoprotein  
559 B. *Molecular biology of the cell* 17, 2674-2683.
- 560 Olarte, M.J., Kim, S., Sharp, M.E., Swanson, J.M.J., Farese, R.V., Jr., and Walther, T.C. (2020).  
561 Determinants of Endoplasmic Reticulum-to-Lipid Droplet Protein Targeting. *Developmental cell*  
562 54, 471-487.e477.
- 563 Olzmann, J.A., and Carvalho, P. (2019). Dynamics and functions of lipid droplets. *Nature*  
564 reviews Molecular cell biology 20, 137-155.
- 565 Rogers, S., Hariri, H., Wood, N.E., Speer, N.O., and Henne, W.M. (2021). Glucose restriction  
566 drives spatial reorganization of mevalonate metabolism. *eLife* 10.
- 567 Santinho, A., Chorlay, A., Foret, L., and Thiam, A.R. (2021). Fat inclusions strongly alter  
568 membrane mechanics. *Biophysical journal* 120, 607-617.
- 569 Schmidt, C., Athenstaedt, K., Koch, B., Ploier, B., and Daum, G. (2013). Regulation of the yeast  
570 triacylglycerol lipase TGL3p by formation of nonpolar lipids. *The Journal of biological chemistry*  
571 288, 19939-19948.
- 572 Shimobayashi S, O.Y. (2019). Universal phase behaviors of intracellular lipid droplets.  
573 *Proceedings of the National Academy of Sciences of the United States of America* 116, 25440-  
574 25445.
- 575 Walther, T.C., Chung, J., and Farese, R.V., Jr. (2017). Lipid Droplet Biogenesis. *Annual review*  
576 of cell and developmental biology 33, 491-510.
- 577 Wang, H., Becuwe, M., Housden, B.E., Chitraju, C., Porras, A.J., Graham, M.M., Liu, X.N.,  
578 Thiam, A.R., Savage, D.B., Agarwal, A.K., *et al.* (2016). Seipin is required for converting  
579 nascent to mature lipid droplets. *eLife* 5.
- 580 Welte, M.A., and Gould, A.P. (2017). Lipid droplet functions beyond energy storage. *Biochimica*  
581 *et biophysica acta Molecular and cell biology of lipids* 1862, 1260-1272.
- 582 Wilfling, F., Wang, H., Haas, J.T., Krahmer, N., Gould, T.J., Uchida, A., Cheng, J.X., Graham,  
583 M., Christiano, R., Fröhlich, F., *et al.* (2013). Triacylglycerol synthesis enzymes mediate lipid  
584 droplet growth by relocating from the ER to lipid droplets. *Developmental cell* 24, 384-399.



585 Wood, N.E., Kositangool, P., Hariri, H., Marchand, A.J., and Henne, W.M. (2020). Nutrient  
586 Signaling, Stress Response, and Inter-organelle Communication Are Non-canonical  
587 Determinants of Cell Fate. *Cell reports* 33, 108446.  
588



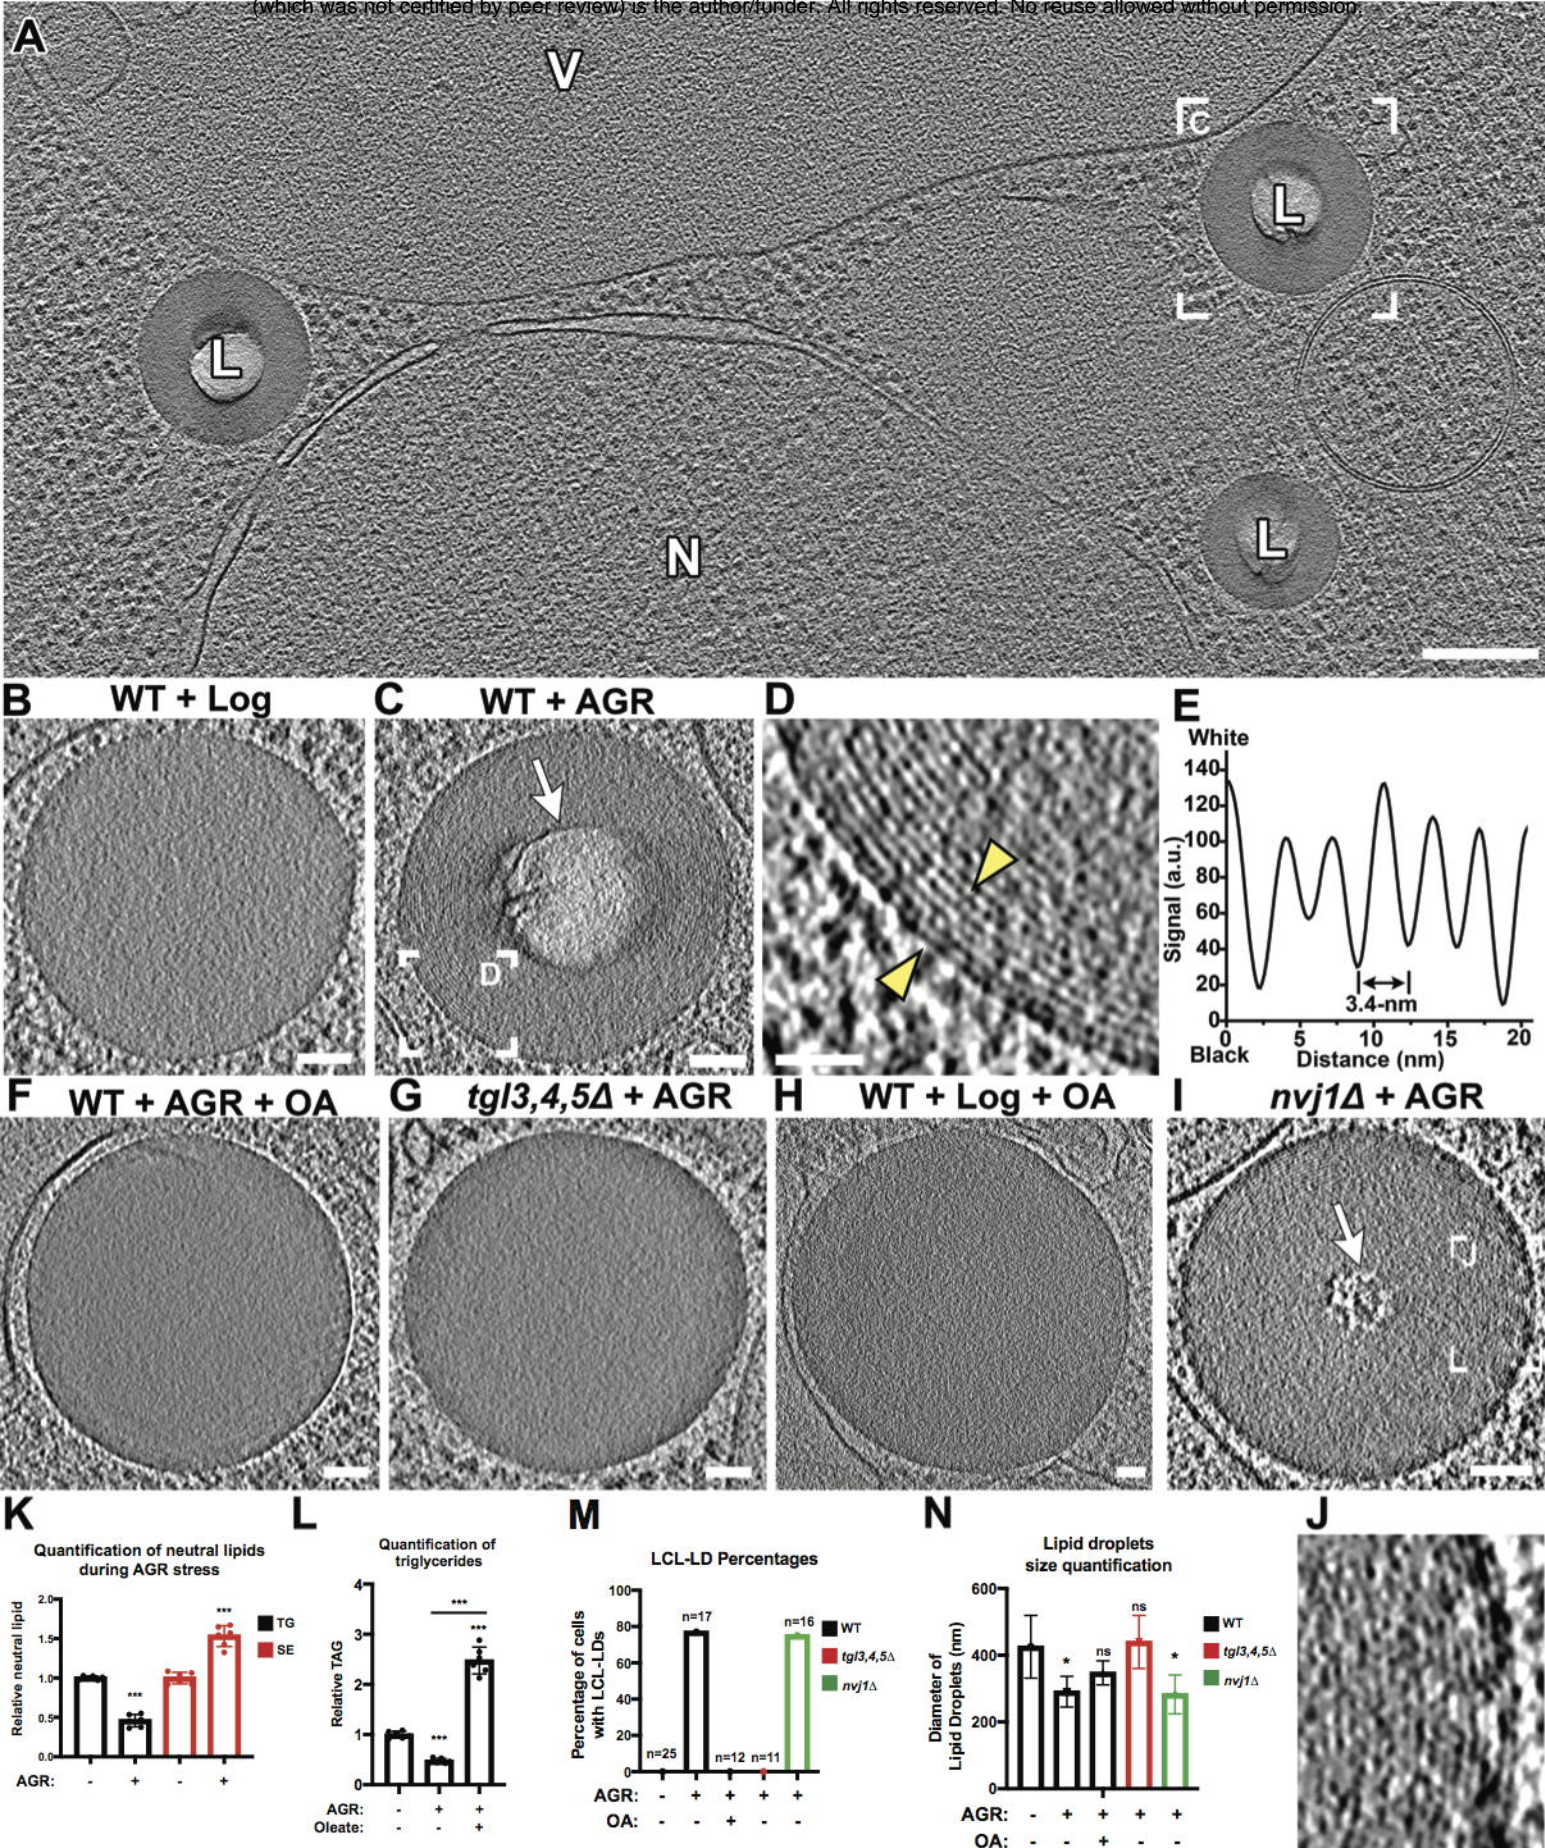

Figure 1



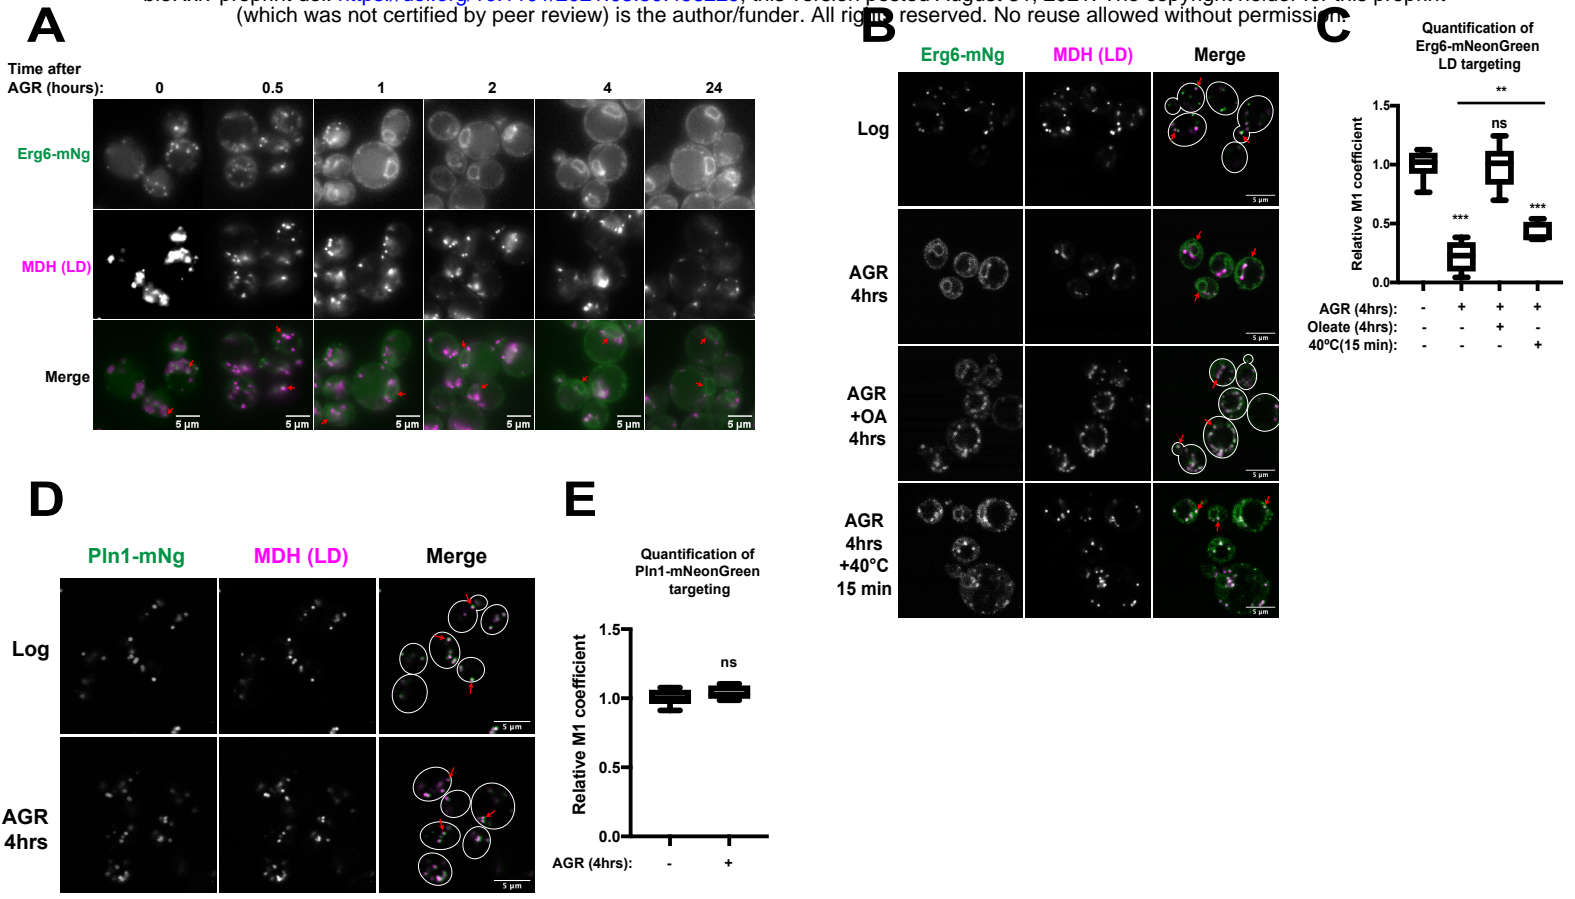

Figure 2

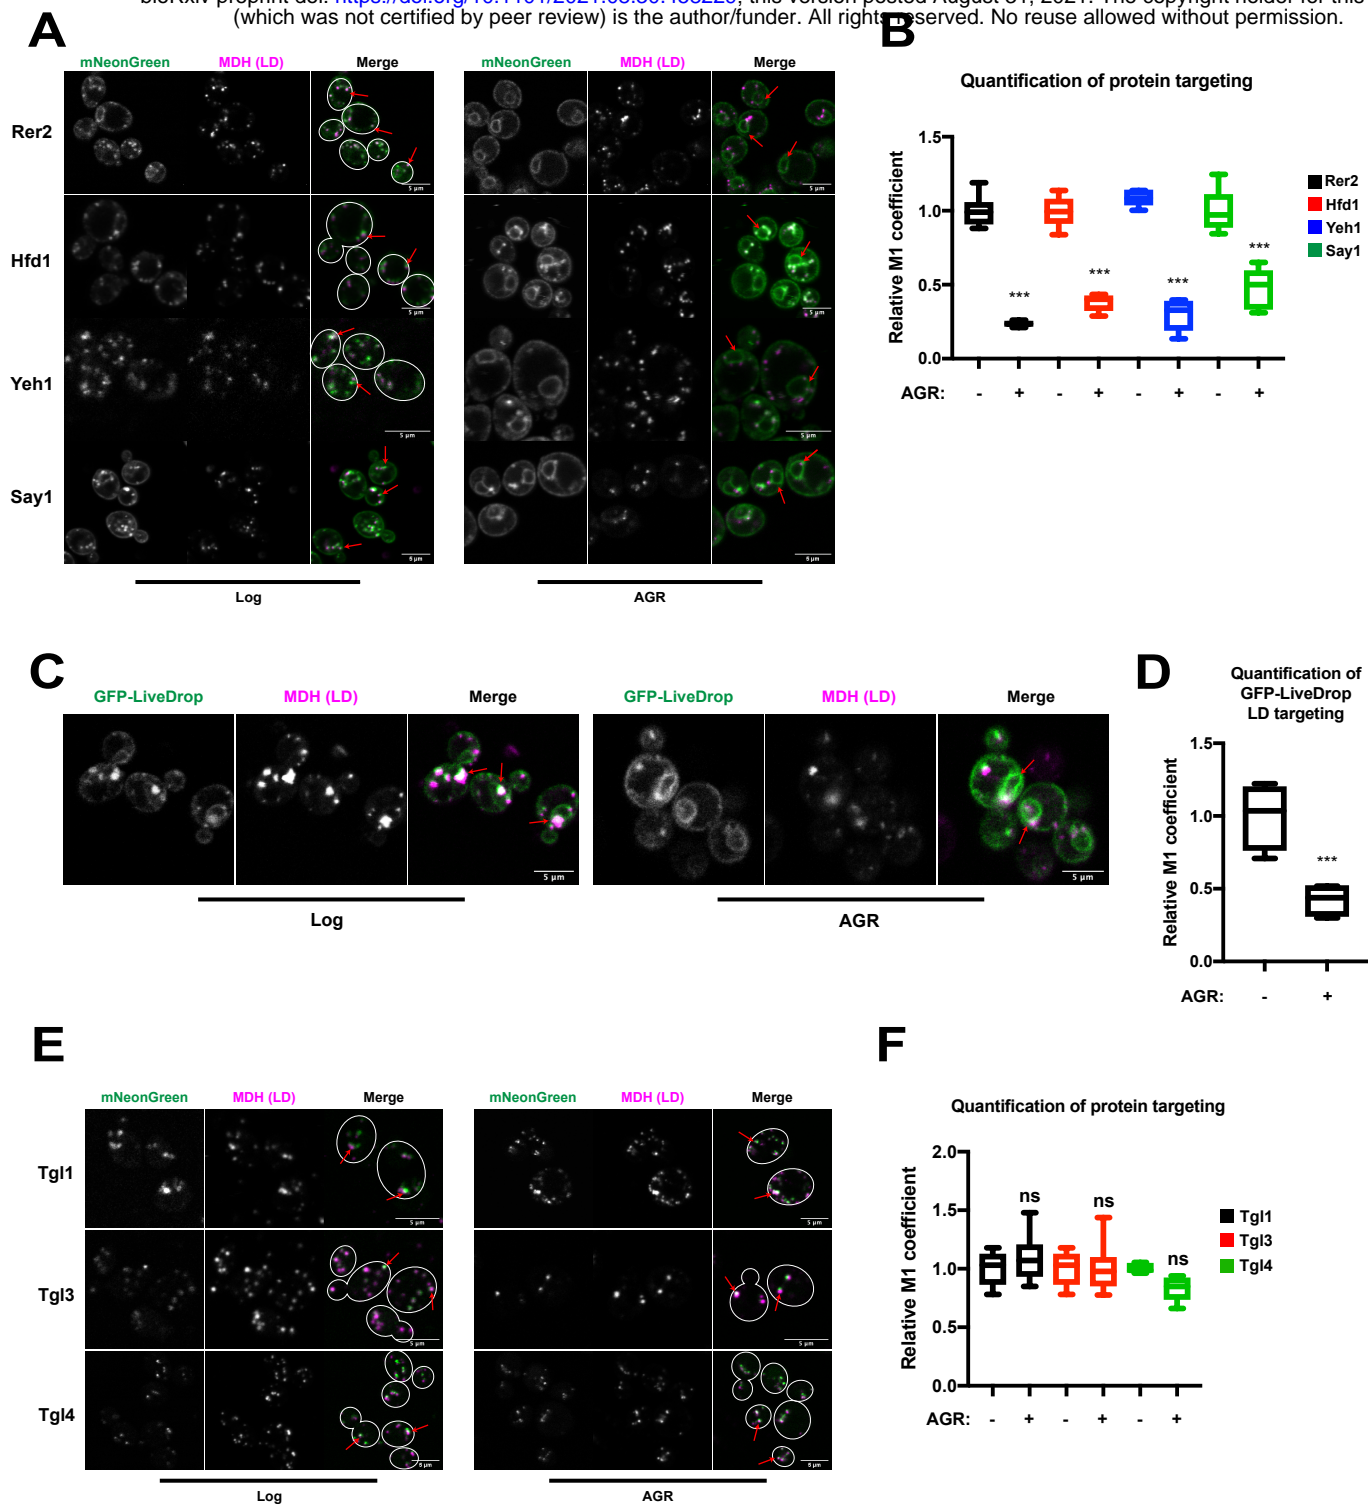

Figure 3

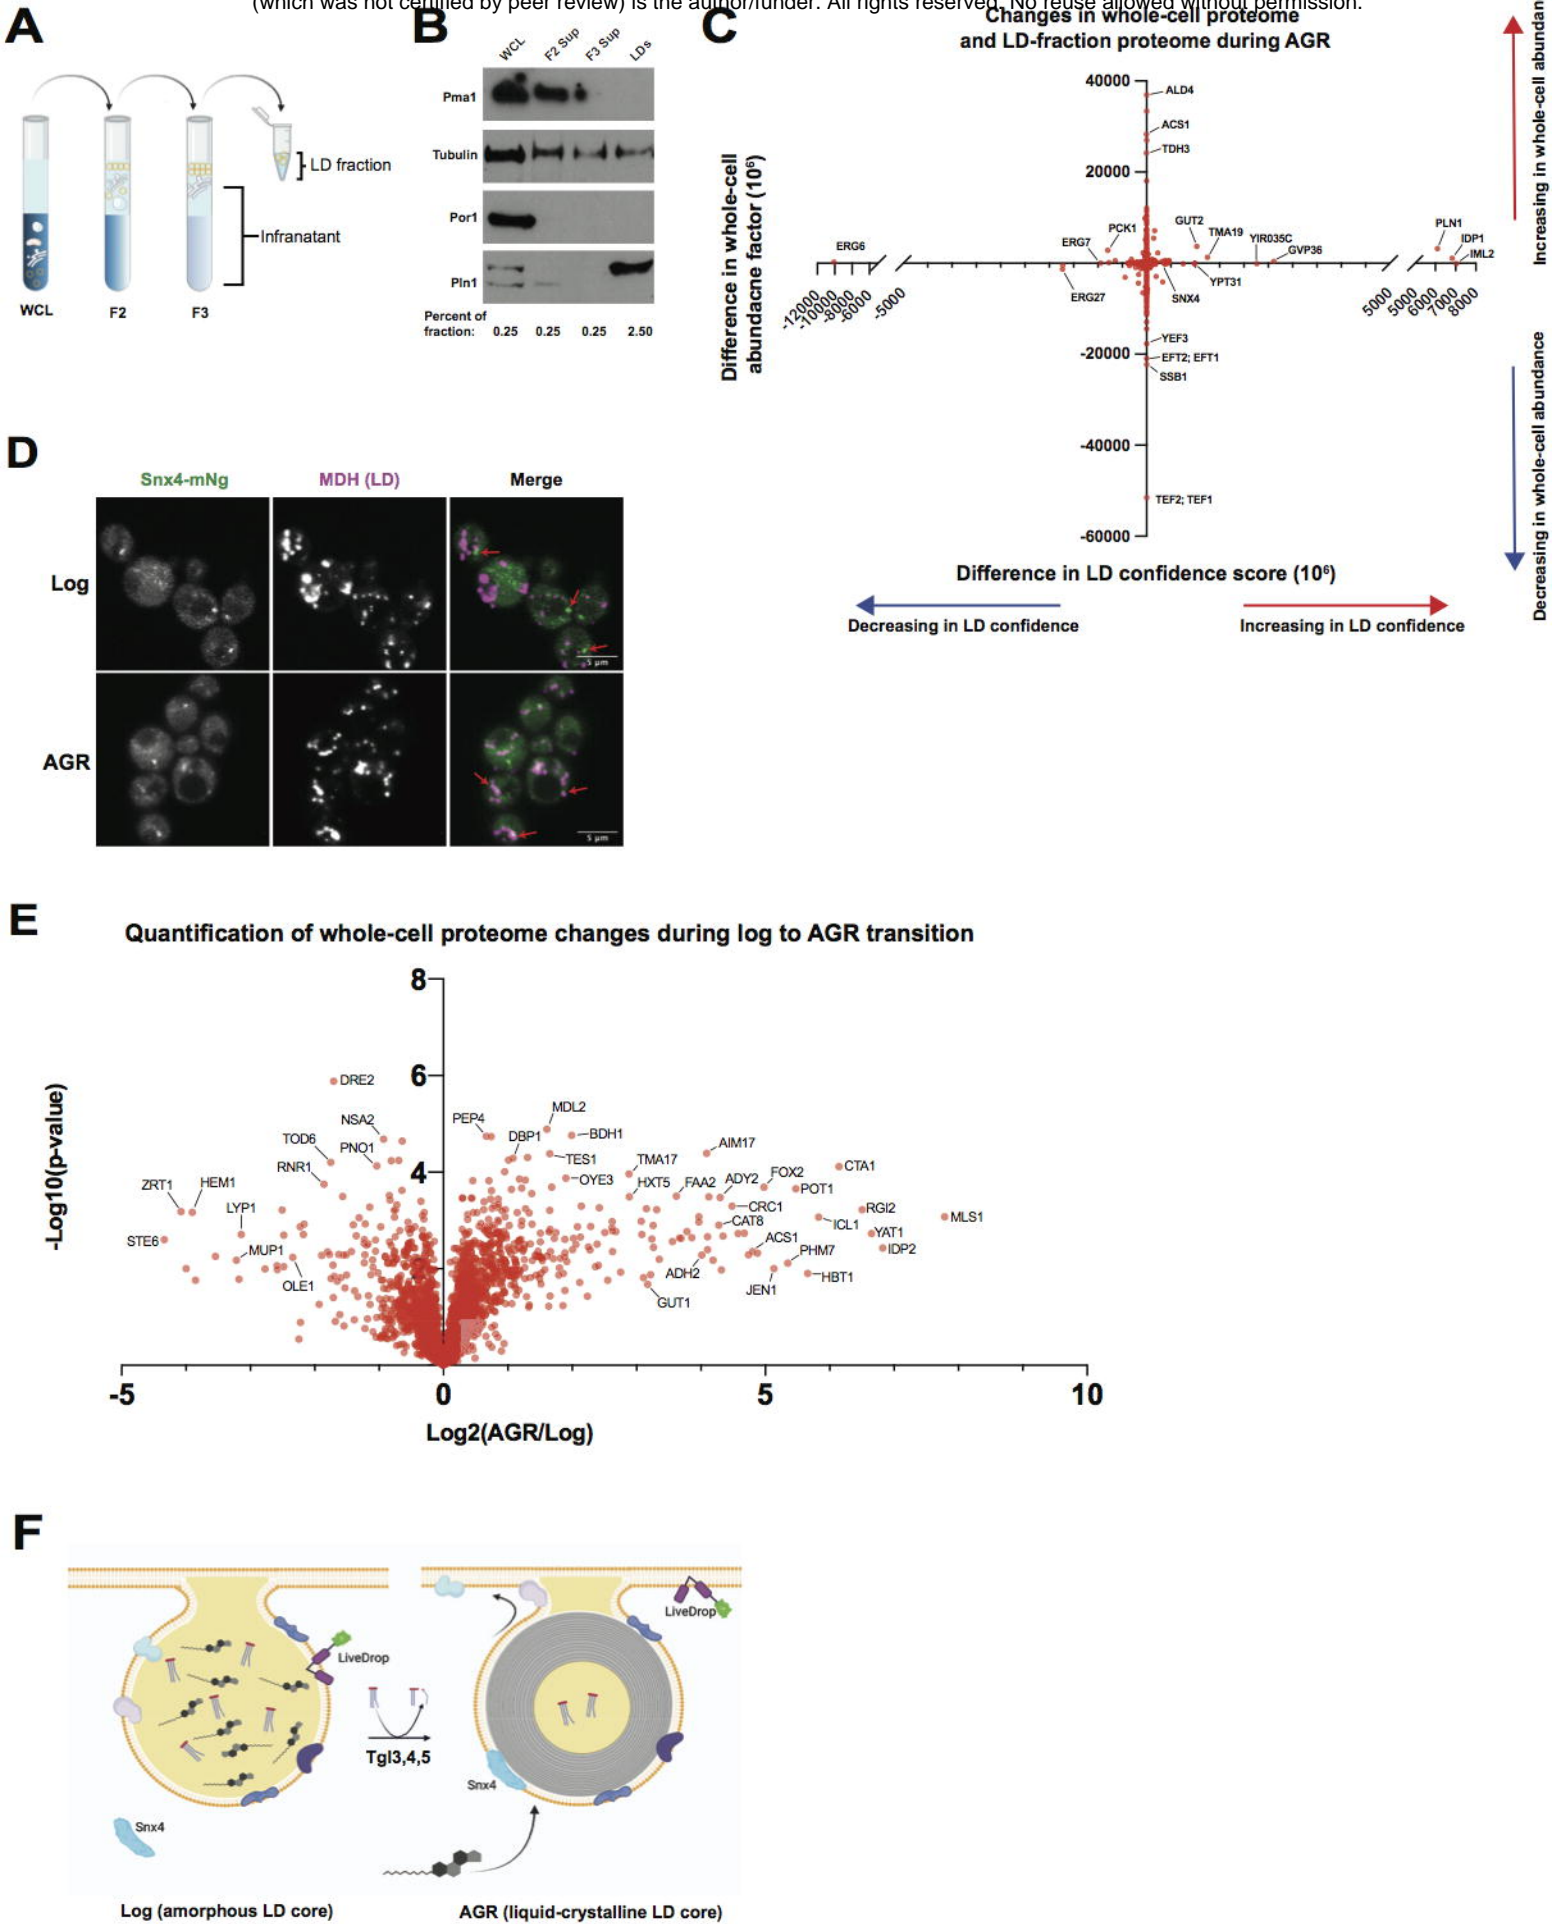

**Figure 4**
